# Supplementary material
Source: PubMed Central journal article supplement (PMC7323581)
Supplement: NIHMS1594058-supplement-Supporting_Figures.pdf [file NIHMS1594058-supplement-Supporting_Figures.pdf]

## **Supporting Information**

### **A Tug of War Between Condensate Phases in a Minimal Macromolecular System**

Archishman Ghosh<sup>1</sup>, Xiaojia Zhang<sup>1</sup>, and Huan-Xiang Zhou<sup>1,2</sup>

<sup>1</sup>Department of Chemistry and <sup>2</sup>Department of Physics, University of Illinois at Chicago,  
Chicago, IL 60607

Correspondence should be addressed to H.X.Z. (e-mail: hzhou43@uic.edu).

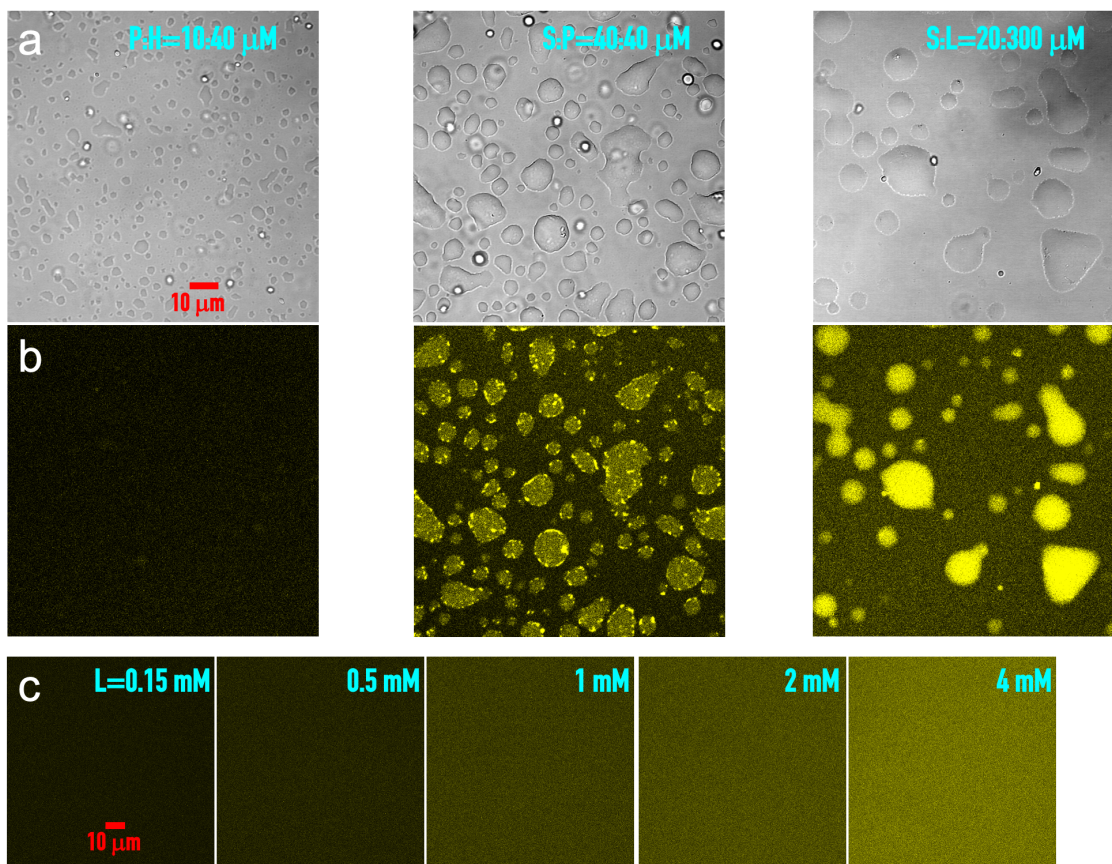

**Figure S1. Different extents of ThT binding to P:H, S:P, and S:L droplets and to L in solutions at varying concentrations. (a)** Brightfield images of P:H, S:P, and S:L droplets after fusion and spread over a coverslip. **(b)** Images of the corresponding droplets shown by ThT fluorescence, indicating no, moderate, and strong ThT binding. Images shown here were taken over a large field of view, from which a cropped region is shown in Fig. 1c. **(c)** Fluorescence images of ThT mixed into five L solutions at concentrations ranging from 0.15 to 4 mM.

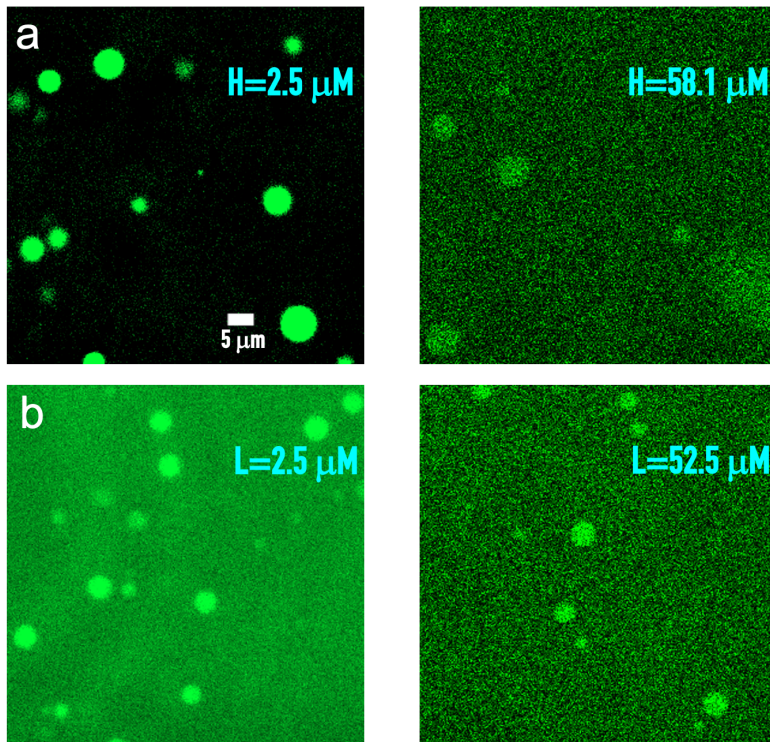

**Figure S2. Images of S:P:H and S:P:L droplets, shown by fluorescence of FITC-heparin and FITC-lysozyme, with S:P = 40:40  $\mu\text{M}$ .** (a) S:P:H, with H at 2.5 or 58.1  $\mu\text{M}$ . The partition coefficient (ratio of concentration inside droplet to concentration in bulk) of H was determined to be  $6.1 \pm 0.05$  and  $1.6 \pm 0.005$  at 2.5 and 58.1  $\mu\text{M}$ , respectively, in previous work [Ghosh et al. Proc Natl Acad Sci USA 116, 194740-19483 (2019)]. (b) S:P:L, with L at 2.5 or 52.5  $\mu\text{M}$ . The partition coefficient of L was  $2.9 \pm 0.08$  and  $2.0 \pm 0.06$  at 2.5 and 52.5  $\mu\text{M}$ , respectively. Here the concentration of each labeled species was 2.5  $\mu\text{M}$ ; images at H = 2.5  $\mu\text{M}$  and at L = 2.5  $\mu\text{M}$  have appeared previously [Ghosh et al. Proc Natl Acad Sci USA 116, 194740-19483 (2019)].

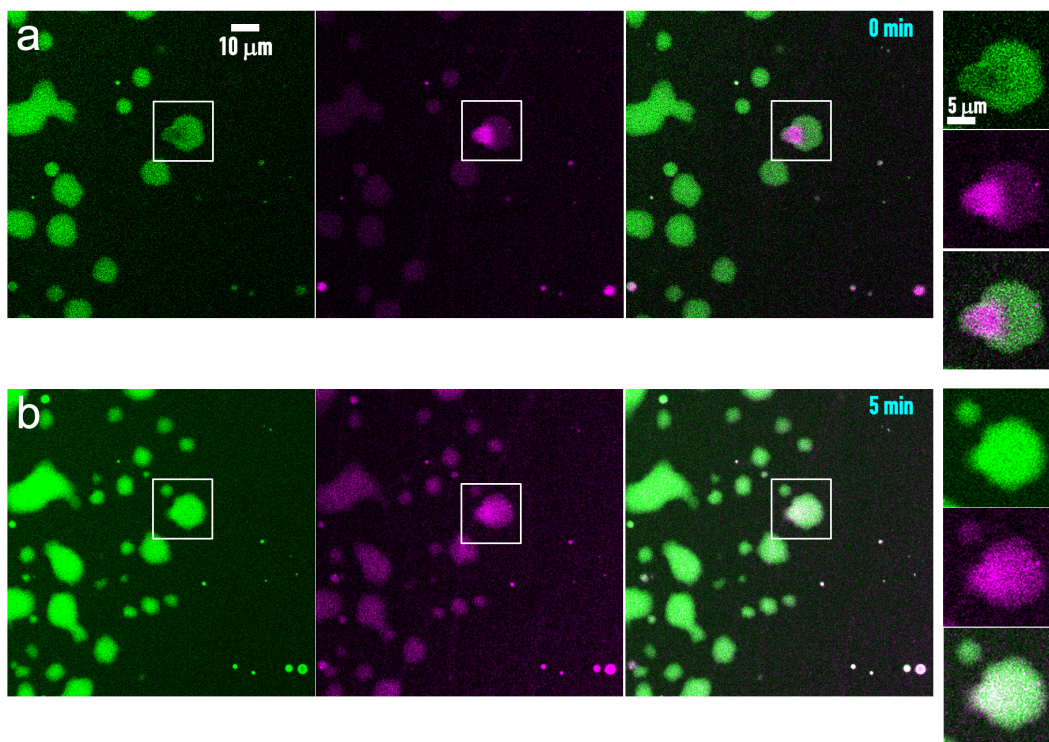

**Figure S3. Images of P:H droplets mixing with S:L droplets, shown by fluorescence of FITC-heparin (green) and Cy5-lysozyme (magenta).** (a) After placing two drops, containing P:H and S:L droplets, respectively, side by side (the former is on the left and the latter on the right), a P:H droplet falls on top of an S:L droplet (region inside white box). From left to right: green channel, magenta channel, their merge, and enlarged views of the boxed region. (b) Corresponding images after 5 min, showing fusion and content mixing of the P:H and S:L droplets. P:H = 40:40  $\mu\text{M}$  and S:L = 30:300  $\mu\text{M}$ . The drops also contained 100 g/L Ficoll70.
